# Supplementary material for: STING activation promotes autologous type I interferon–dependent development of type 1 regulatory T cells during malaria
Source: PubMed Central journal article supplement (PMC10541195; doi:10.1172/jci169417), 2023-10-02
Supplement: jci-133-169417-s198.pdf [file jci-133-169417-s198.pdf]

**A**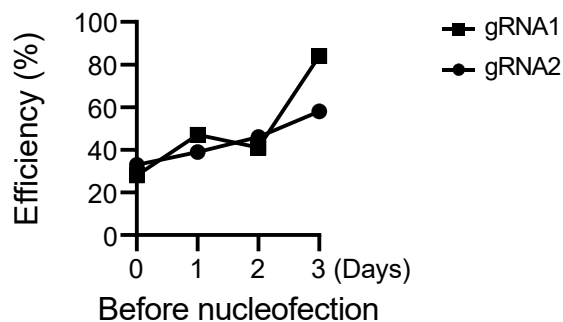**B**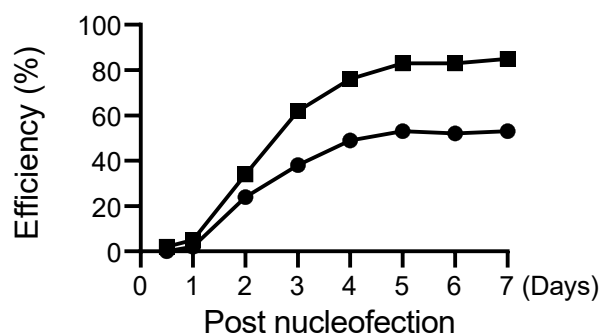**C**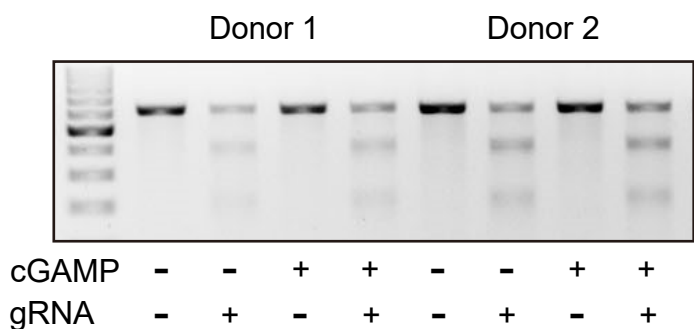**D**

| Guide Target         | PAM                         | Indel %                     |
|----------------------|-----------------------------|-----------------------------|
| GGCUGUCACUCACAGGUACC | GGG                         | 73                          |
| Indel                | Sequence                    |                             |
| +1 42%               | G T A G C T G C C C C G G T | N A C C T G T G A G T G A C |
| 0 17%                | G T A G C T G C C C C G G T | A C C T G T G A G T G A C A |
| -1 14%               | G T A G C T G C C C C G G T | - C C T G T G A G T G A C A |
| -6 4%                | G T A G C T G C - - - - -   | A C C T G T G A G T G A C A |
| -12 4%               | G T A G C T G C C C C G G T | - - - - - - - - - C A       |
| -1 3%                | G T A G C T G C C C C G G - | A C C T G T G A G T G A C A |
| -3 3%                | G T A G C T G C C C C G G T | - - - T G T G A G T G A C A |
| -2 2%                | G T A G C T G C C C C G G T | - - C T G T G A G T G A C A |
| -6 1%                | G T A G C T G C C C C G G T | - - - - - G A G T G A C A   |

**Figure S1. Optimization of the CRISPR/Cas9 gene editing protocol for human activated CD4<sup>+</sup> T cells.** **A**, Peripheral blood CD4<sup>+</sup> T cells from a healthy volunteer were stimulated with  $\alpha$ CD3 $\epsilon$  and  $\alpha$ CD28 mAbs plus IL-2 for 0, 1, 2 and 3 days before nucleofection with two different *TMEM173* guide RNAs (gRNA), and were stimulated for another 3 days, as above, before analysis. Gene-editing efficiency was measured by Big Dye Sequencing. **B**, CD4<sup>+</sup> T cells from healthy volunteers were stimulated with  $\alpha$ CD3 $\epsilon$  and  $\alpha$ CD28 mAbs plus IL-2 for 3 days before nucleofection with two different *TMEM173* gRNA and were then stimulated for 0 to 7 days before Big Dye Sequencing to calculate the efficiency of gene editing. **C**, CD4<sup>+</sup> T cells were stimulated for 3 days, as above, transfected with *TEMEM 173* gRNA1, then stimulated for another 3 days with the addition of cGAMP 18 hours before analysis, as indicated. Representative T7 endonuclease I mismatch assay showing *TMEM173* modifications. **D**, Representative Inference of CRISPR Edits (ICE) analysis (<https://ice.synthego.com/#/>) of Big Dye Sequencing data showing the editing efficiency, deletions or insertion of single nucleotides or fragments (Indels).

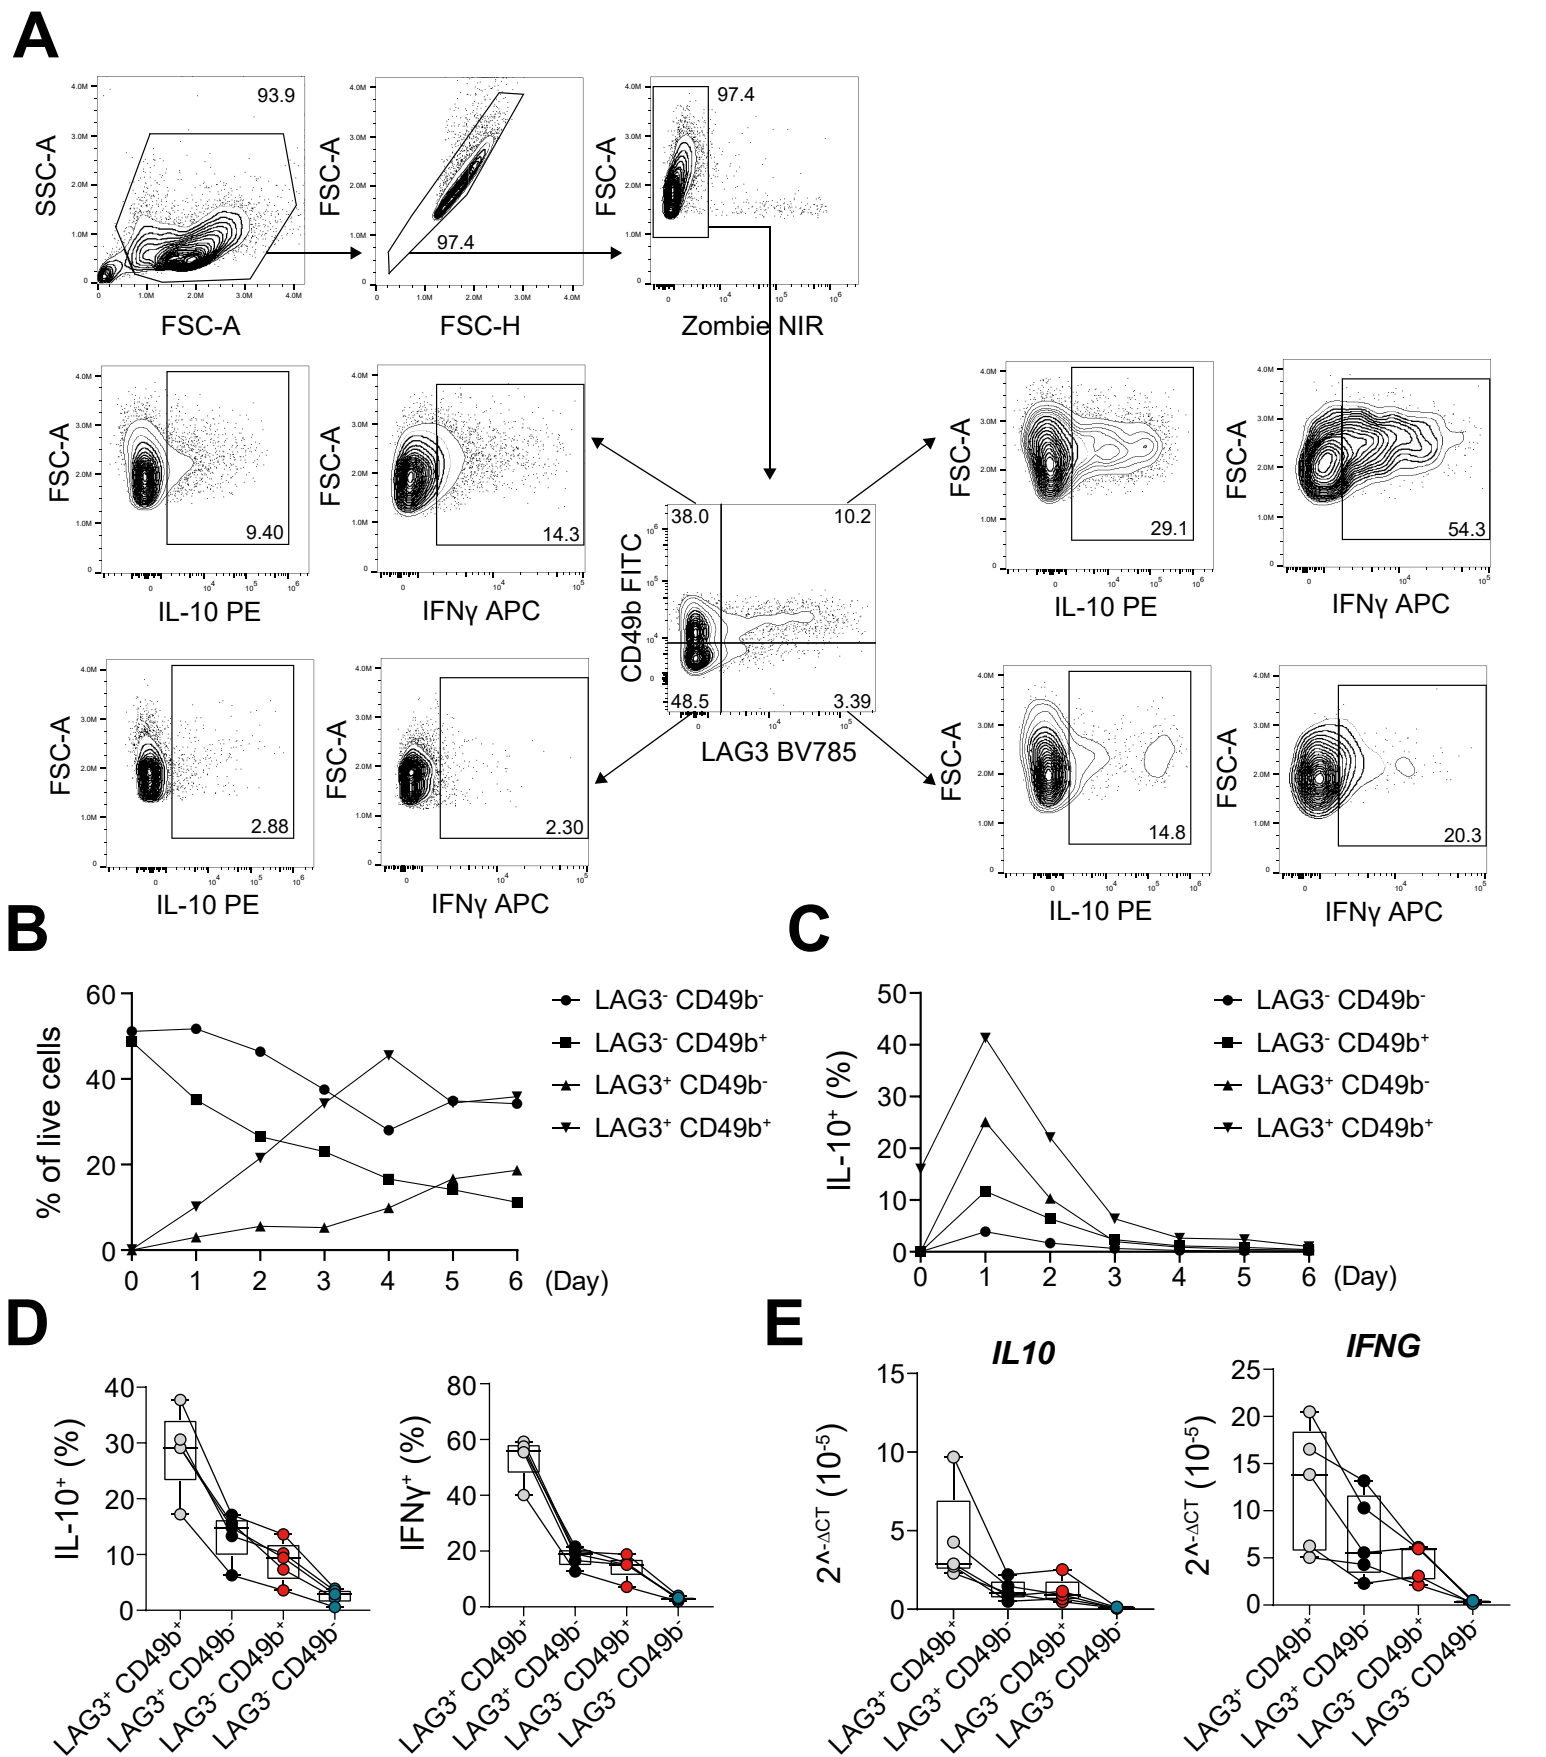

**Figure S2. LAG3 and CD49b are surrogate markers for Tr1 cells.** **A**, Peripheral blood CD4<sup>+</sup> T cells from healthy volunteers (n = 4) were stimulated with  $\alpha$ CD3 $\epsilon$  and  $\alpha$ CD28 mAbs plus IL-2 for 0 to 6 days. LAG3, CD49b, IL-10 and IFN $\gamma$  expression was measured every day. The gating strategy for IL-10<sup>+</sup>, IFN $\gamma$ <sup>+</sup>, and LAG3<sup>+</sup> CD49b<sup>+</sup> CD4<sup>+</sup> T cells is shown. **B**, Changes in the frequency of LAG3<sup>+</sup> CD49b<sup>+</sup> CD4<sup>+</sup> T cells from day 0 to day 6. **C**, The kinetics of IL-10 expression by CD4<sup>+</sup> T cell subsets based on LAG3 and CD49b expression. **D**, Purified CD4<sup>+</sup> T cells from healthy volunteers were stimulated with  $\alpha$ CD3 $\epsilon$  and  $\alpha$ CD28 mAbs plus IL-2 for 1 day. Half of the cells were stained for LAG3, CD49b, IL-10 and IFN $\gamma$ , while the other half were sorted into CD4<sup>+</sup> T cell subsets based on LAG3 and CD49b expression. The expression of IL-10 and IFN $\gamma$  protein by cell subsets is shown. **E**, *IL10* and *IFNG* mRNA in sorted LAG3 and CD49b CD4<sup>+</sup> T cell subsets was measured by qPCR. Data was normalized to the housekeeping gene *18S* rRNA.

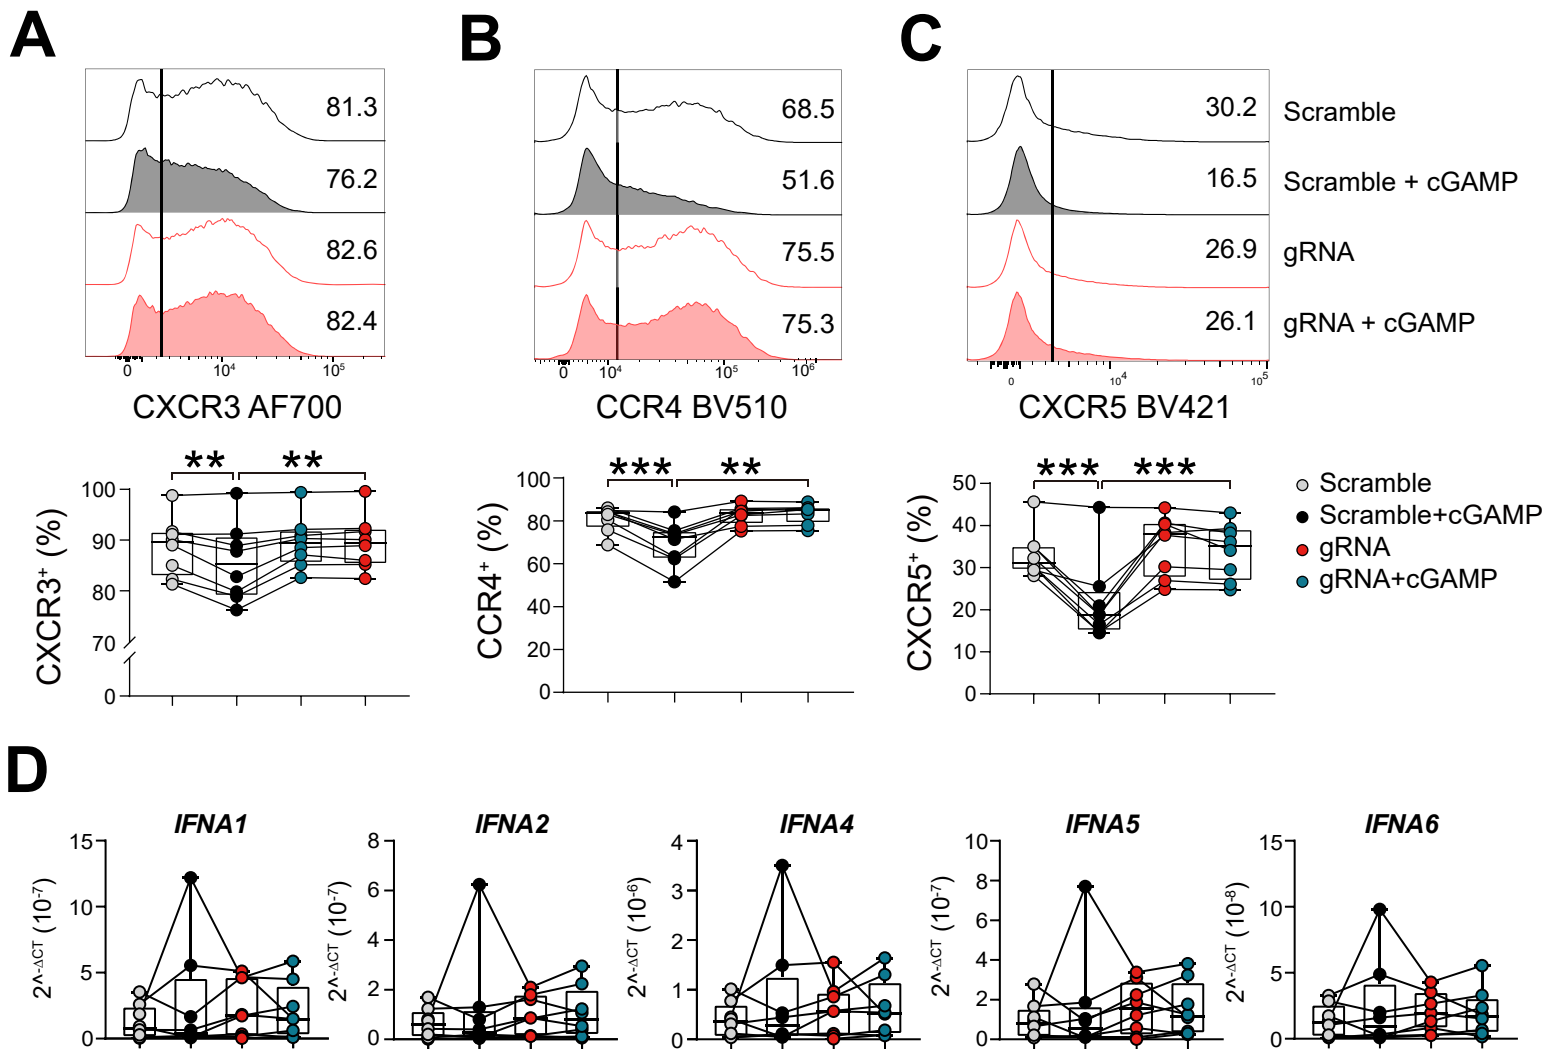

**Figure S3. STING inhibits the expression of CXCR3<sup>+</sup>, CCR4<sup>+</sup> and CXCR5<sup>+</sup> by CD4<sup>+</sup> T cells. A, B, C,** Representative histograms and enumeration showing the frequency of CXCR3<sup>+</sup>, CCR4<sup>+</sup> and CXCR5<sup>+</sup> CD4<sup>+</sup> T cells, respectively, following CRISPR/Cas9 to modify *TMEM173* expression. **D,** *IFNA1*, *IFNA2*, *IFNA4*, *IFNA5* and *IFNA6* mRNA was measured by qPCR. Data was normalized to the housekeeping gene *18S* rRNA. **A, B, C** and **D:** n=8, repeated measures two-way ANOVA with Šídák's multiple comparisons test, \*\*P < 0.01 and \*\*\*P < 0.001.

**A**CD45.1<sup>+</sup> CD45.2<sup>+</sup>  
PbTII<sup>WT</sup>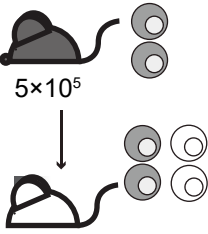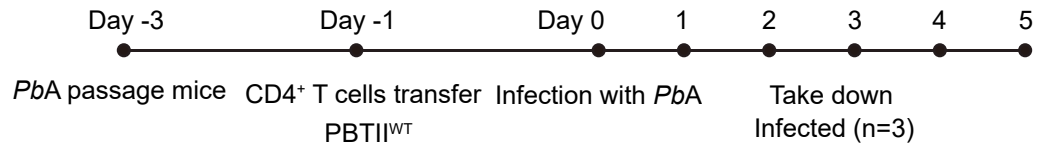**B**CD45.1<sup>+</sup> Host mice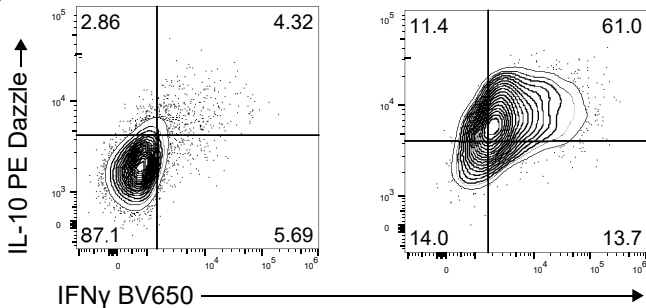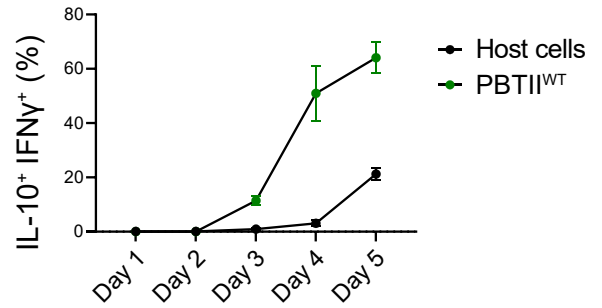**C**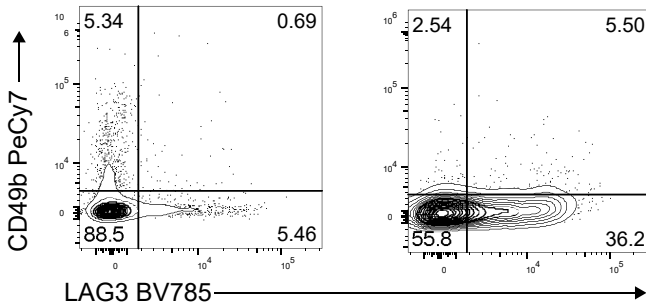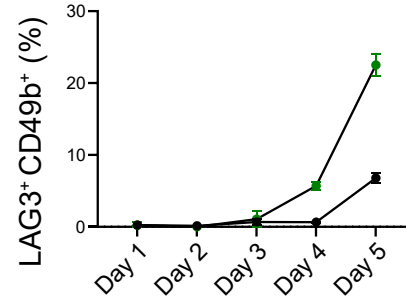**D**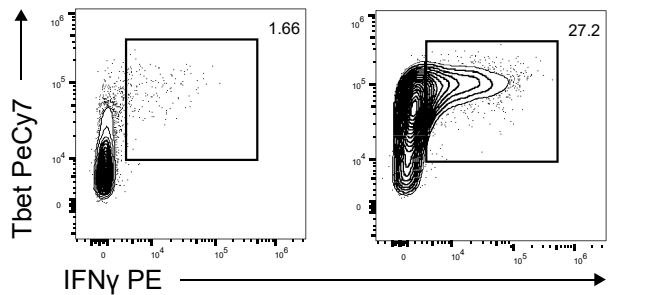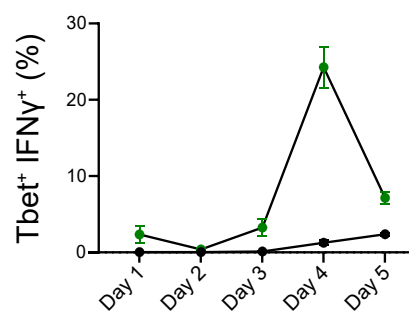**E**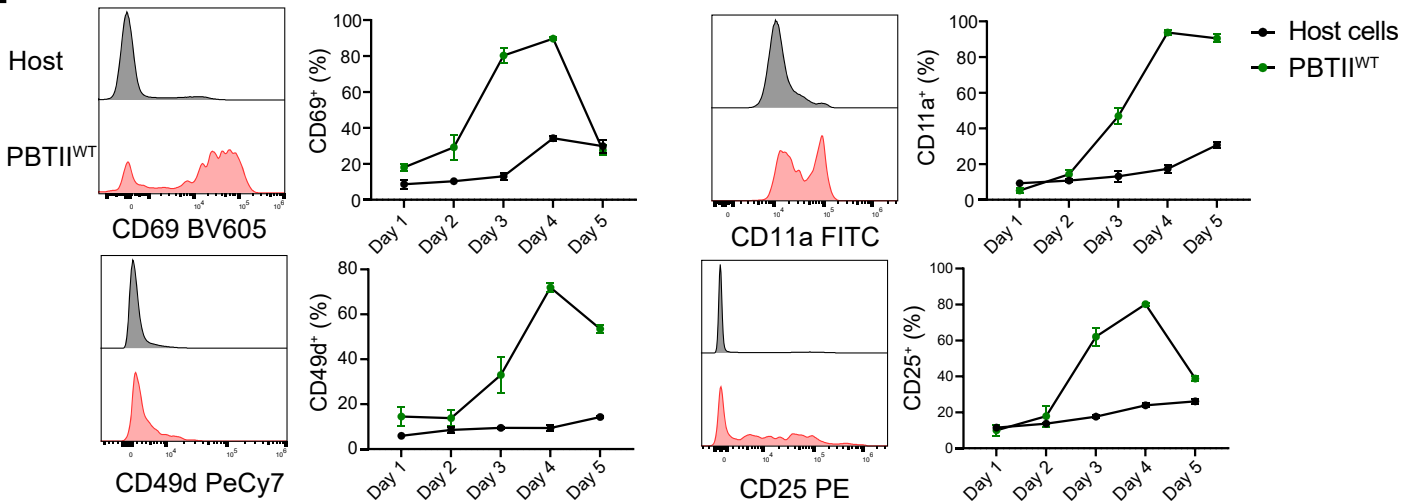

**Figure S4. The kinetics of immune PbTII cell expansion in response to *Plasmodium berghei* ANKA (*PbA*) infection.** **A**,  $5 \times 10^5$  CD45.1<sup>+</sup> CD45.2<sup>+</sup> PbTII<sup>WT</sup> cells were transferred into the *ptprca* (CD45.1<sup>+</sup>) host mice at day -1. The mice were infected with *PbA* on day 0 and were taken down from day 1 to day 5 post-infection (p.i.). **B**, **C**, **D**, Representative plots and enumeration showing the frequencies of IL-10<sup>+</sup> IFN $\gamma$ <sup>+</sup>, LAG3<sup>+</sup> CD49b<sup>+</sup> cells and Tbet<sup>+</sup> IFN $\gamma$ <sup>+</sup> PbTII<sup>WT</sup> cells from day 1 to 5 p.i.. **E**, Representative histograms and enumeration showing the expression of the activation markers CD69, CD11a, CD49d and CD25 by PbTII<sup>WT</sup> cells from day 1 to 5 p.i..

**A**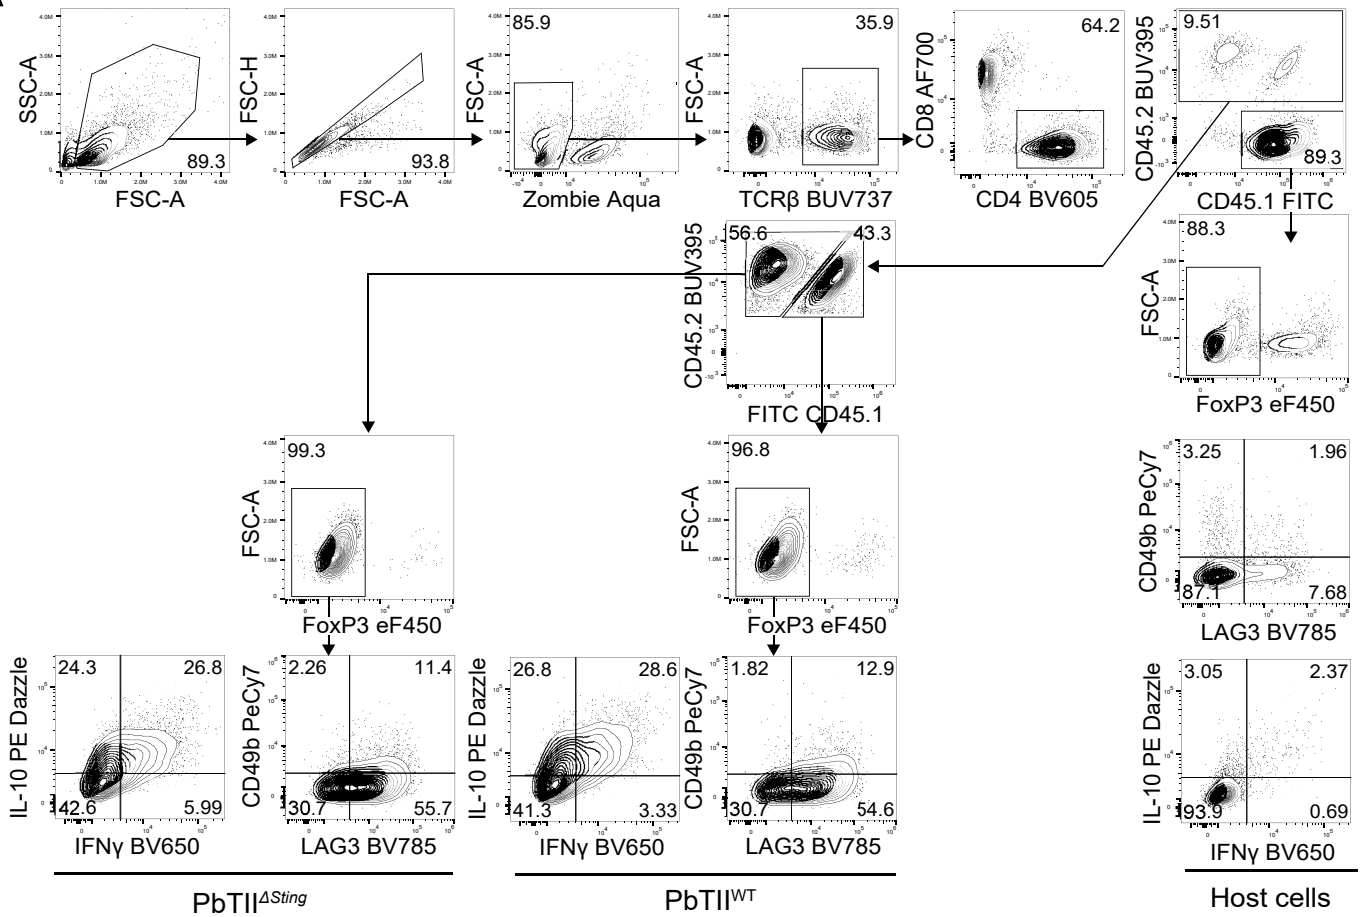**B**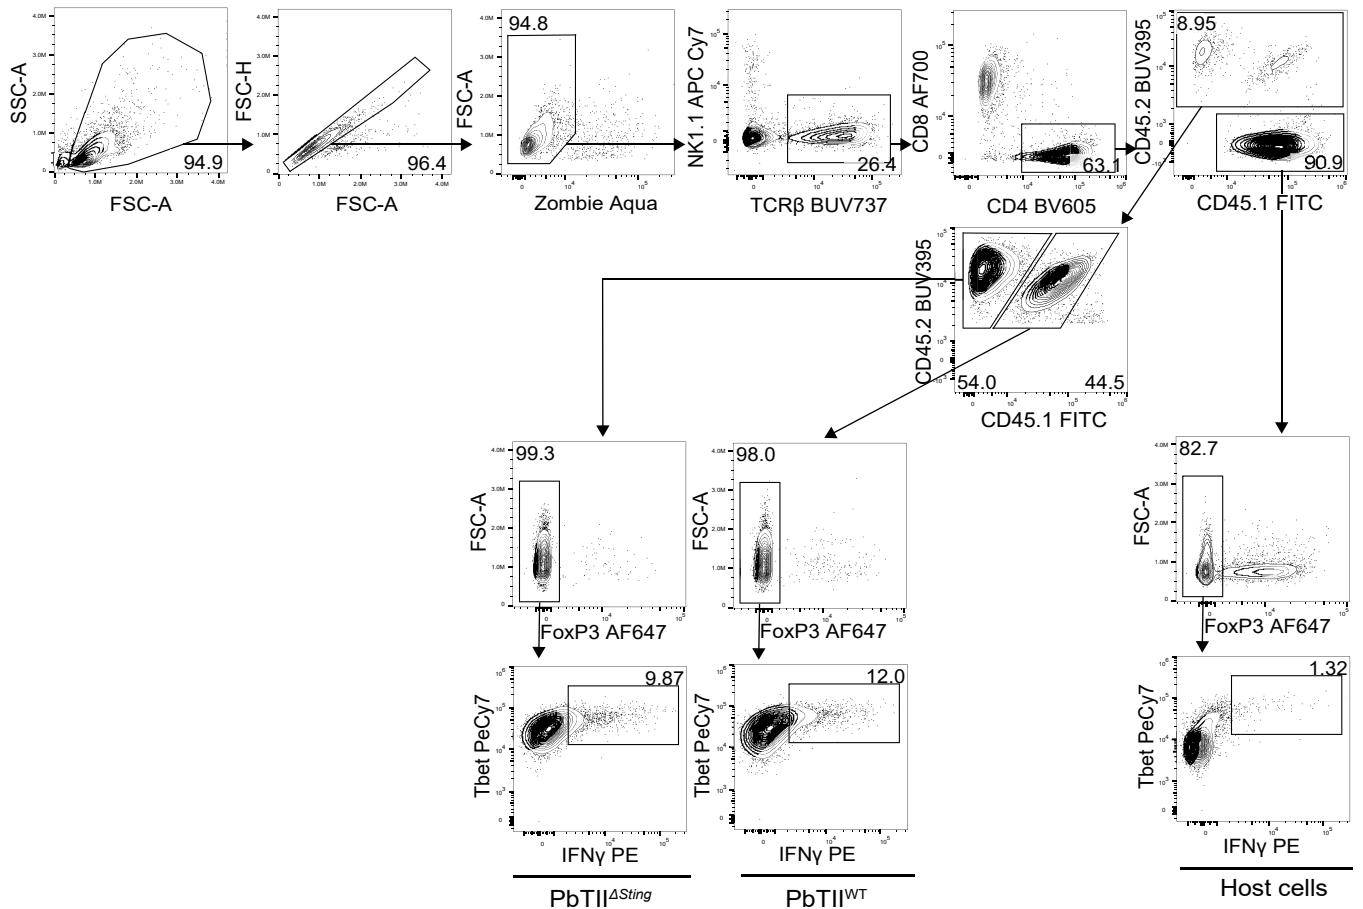

**Figure S5. Identification of Tr1 and Th1 PbTII $\Delta$ Sting and PbTII<sup>WT</sup> cells.** Live cells were selected, followed by gating on CD4<sup>+</sup> T cells. These cells were then divided into adoptively transferred PbTII $\Delta$ Sting and PbTII<sup>WT</sup> cells, based on congenic marker expression. **A**, IL-10<sup>+</sup> IFN $\gamma$ <sup>+</sup> and LAG3<sup>+</sup> CD49d<sup>+</sup> PbTII $\Delta$ Sting and PbTII<sup>WT</sup> Tr1 cells, and **B**, Tbet<sup>+</sup> IFN $\gamma$ <sup>+</sup> PbTII $\Delta$ Sting and PbTII<sup>WT</sup> Th1 cells were then assessed.

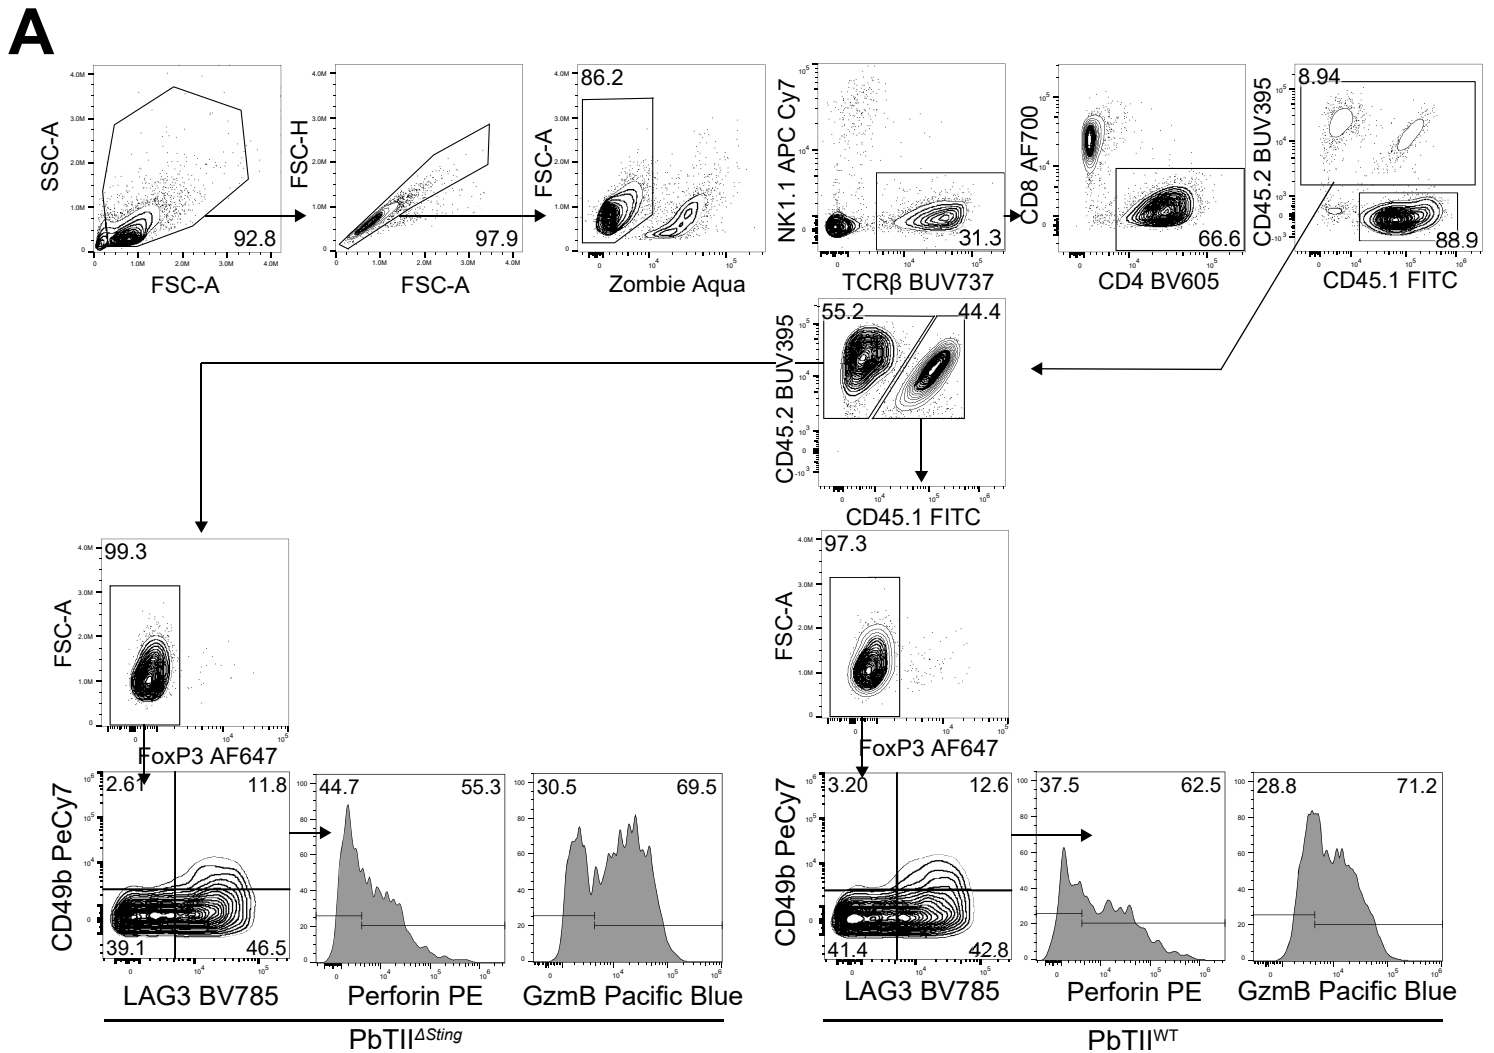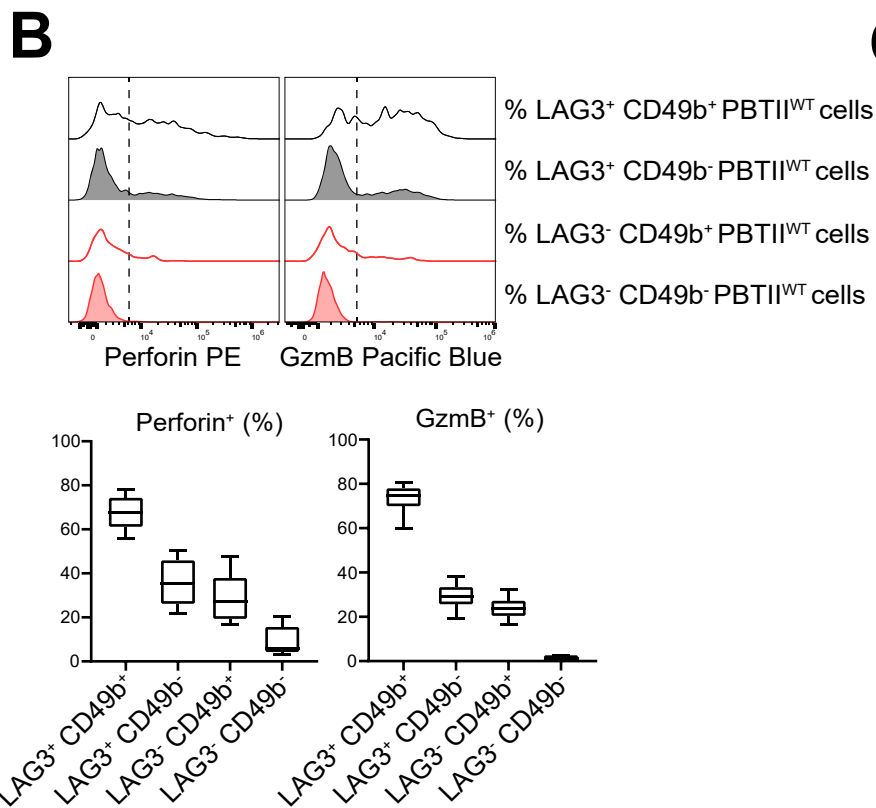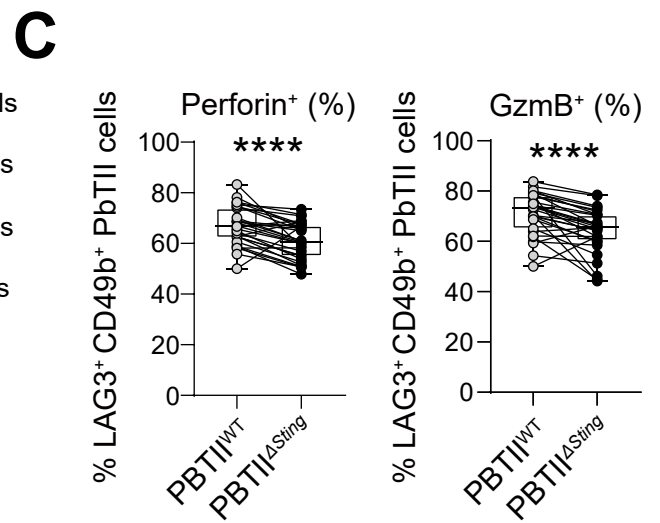

**Figure S6. STING promotes the expression of cytotoxic molecules by Tr1 cells in experimental malaria.** Spleen cells from day 4 post-infection with *Plasmodium berghei* ANKA were stimulated with monensin, PMA and ionomycin for 3 hours *ex vivo* before antibody staining. **A**, The gating strategy used to assess the frequency of Tr1 cells and their expression of cytotoxic molecules. **B**, Representative histograms and enumeration showing the expression of perforin and granzyme B (GzmB) by PbTII<sup>WT</sup> cell subsets based on LAG3 and CD49b expression. **C**, The enumeration showing the frequency of perforin<sup>+</sup> or GzmB<sup>+</sup> PbTII $\Delta$ Sting and PbTII<sup>WT</sup> Tr1 cells. n = 15/group, pooled from 3 independent experiments, two-tailed paired t-test, P<0.001.

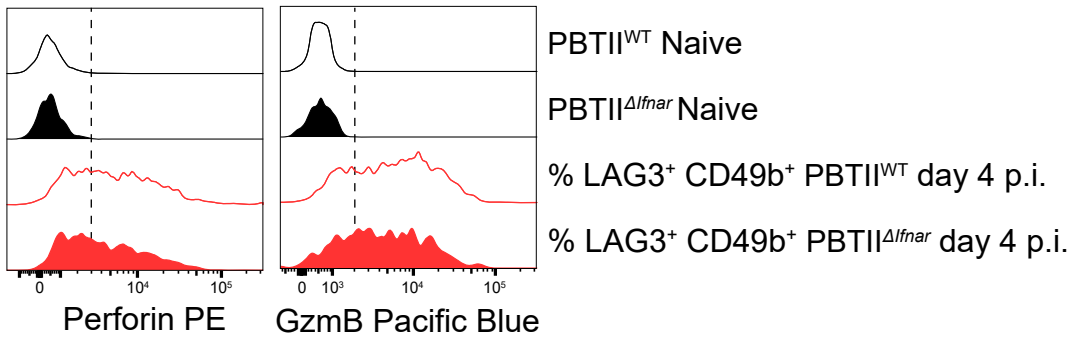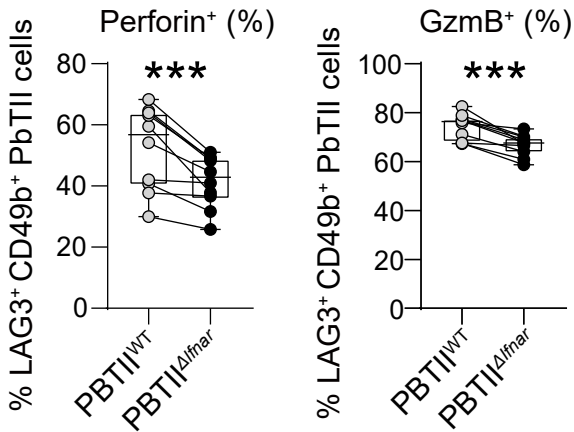

**Figure S7. Type I IFN signalling promotes the expression of cytotoxic molecules by Tr1 PbtTII cells during malaria.** Spleen cells from day 4 post-infection with *Plasmodium berghei* ANKA were stimulated with monensin, PMA and ionomycin for 3 hours *ex vivo* before antibody staining. Representative histogram and enumeration showing the frequencies of perforin<sup>+</sup> or granzyme B (GzmB)<sup>+</sup> Tr1 cells in PbtTII<sup>ΔIfnar</sup> and PbtTII<sup>WT</sup> cells. n = 10/group, pooled from 2 independent experiments, two-tailed paired t-test, P<0.001.

**A**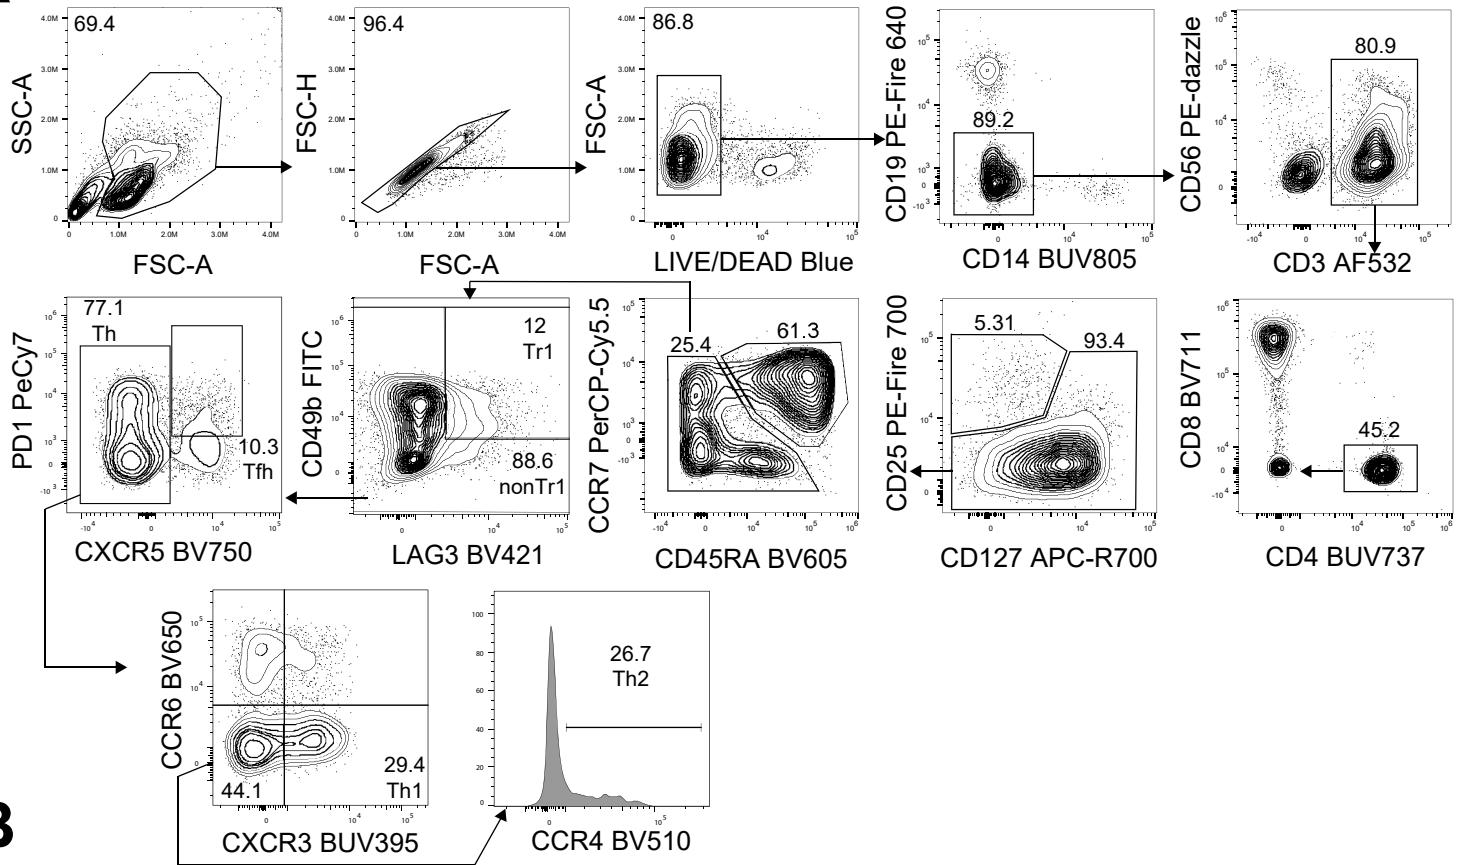**B**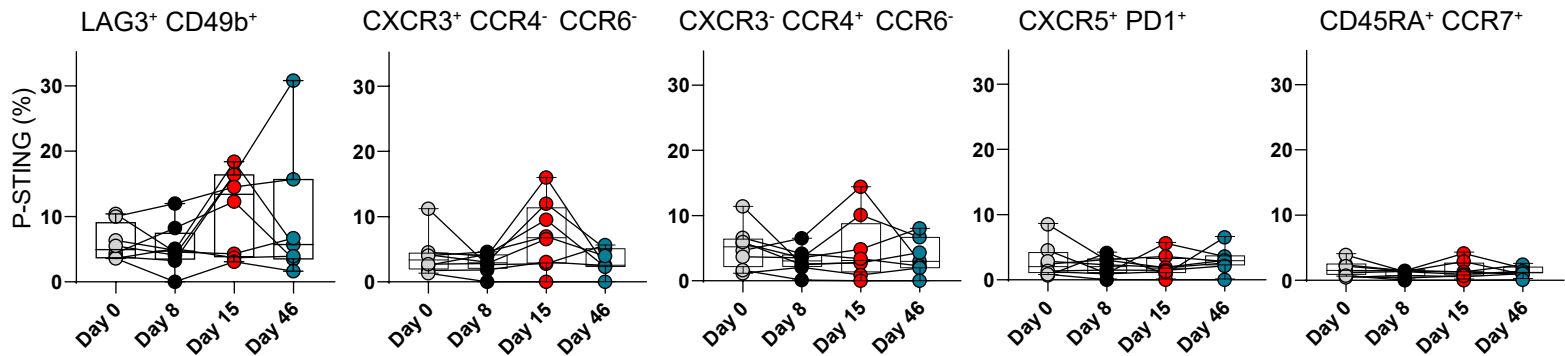

**Figure S8. Tr1 cells from humans infected with *Plasmodium falciparum* are more sensitive to STING activation.** A, The gating strategy used to identify CD4<sup>+</sup> T cell subsets. B, The frequency of different Th cell subsets that contained phosphorylated STING (P-STING) from day 0 post-infection (p.i.) to 46 p.i. in the presence of cGAMP for 18h.



**Supplemental Table 1. Key resources.**

| REAGENT or RESOURCE                                        | SOURCE                    | IDENTIFIER    |
|------------------------------------------------------------|---------------------------|---------------|
| <b><i>Antibodies</i></b>                                   |                           |               |
| APC-R700 Mouse anti-human CD25                             | BD Horizon™               | Cat#565106    |
| Ultra-LEAF™ Purified anti-human CD3                        | BioLegend                 | Cat#317326    |
| Ultra-LEAF™ Purified anti-human CD28                       | BioLegend                 | Cat#302934    |
| Brilliant Violet 605™ anti-human CD366 (Tim-3) Antibody    | BioLegend                 | Cat#345018    |
| V450 Mouse Anti-Human CD127                                | BD Bioscience             | Cat#560823    |
| APC anti-human CD223 (LAG-3) Antibody                      | BioLegend                 | Cat#369212    |
| Brilliant Violet 421™ anti-human CD223 (LAG-3) Antibody    | BioLegend                 | Cat#369313    |
| Brilliant Violet 785™ anti-human CD223 (LAG-3) Antibody    | BioLegend                 | Cat#369322    |
| Alexa Fluor® 647 Phospho-STING (Ser366) (D8K6H) Rabbit mAb | Cell Signaling Technology | Cat#43499     |
| FITC anti-human CD49b Antibody                             | BioLegend                 | Cat#359305    |
| Brilliant Violet 421™ anti-human CD279 (PD-1)              | BioLegend                 | Cat#329920    |
| PE/Dazzle™ 594 anti-human TIGIT                            | BioLegend                 | Cat#372716    |
| beta Actin Loading Control Monoclonal Antibody (BA3R)      | Life Technologies         | Cat#MA5-15739 |
| STING (D2P2F) Rabbit mAb                                   | Cell Signaling Technology | Cat#13647     |

|                                                            |                   |               |
|------------------------------------------------------------|-------------------|---------------|
| IRDye® 680RD Donkey anti-Mouse IgG<br>Secondary Antibody   | LI-COR Bioscience | Cat#926-68072 |
| IRDye® 800CW Goat anti-Rat IgG Secondary<br>Antibody       | LI-COR Bioscience | Cat#926-32219 |
| Alexa Fluor® 647 anti-mouse/rat/human<br>FOXP3 Antibody    | BioLegend         | Cat#320014    |
| Alexa Fluor® 700 anti-mouse CD8a Antibody                  | BioLegend         | Cat#100730    |
| APC/Cyanine7 anti-mouse NK-1.1 Antibody                    | BioLegend         | Cat#108724    |
| FITC anti-mouse CD45.1 Antibody                            | BioLegend         | Cat#110706    |
| PE anti-mouse IFN- $\gamma$ Antibody                       | BioLegend         | Cat#505808    |
| PE/Cyanine7 anti-T-bet Antibody                            | BioLegend         | Cat#644824    |
| Brilliant Violet 650™ anti-mouse CD183<br>(CXCR3) Antibody | BioLegend         | Cat#126531    |
| Brilliant Violet 711™ anti-mouse CD45.2<br>Antibody        | BioLegend         | Cat#109847    |
| APC anti-mouse TIGIT (Vstm3) Antibody                      | BioLegend         | Cat#142106    |
| APC/Fire™ 750 anti-mouse CD279 (PD-1)<br>Antibody          | BioLegend         | Cat#135240    |
| PerCP/Cyanine5.5 anti-mouse CD195 (CCR5)<br>Antibody       | BioLegend         | Cat#107016    |
| PE anti-mouse CD366 (Tim-3) Antibody                       | BioLegend         | Cat#134004    |
| PE/Dazzle™ 594 anti-mouse IL-10 Antibody                   | BioLegend         | Cat#505034    |
| PE/Cyanine7 anti-mouse CD49b Antibody                      | BioLegend         | Cat#103518    |

|                                                                          |               |                |
|--------------------------------------------------------------------------|---------------|----------------|
| Brilliant Violet 605™ anti-mouse CD152 Antibody                          | BioLegend     | Cat#106323     |
| Brilliant Violet 785™ anti-mouse CD223 (LAG-3) Antibody                  | BioLegend     | Cat#125219     |
| PE anti-mouse Perforin Antibody                                          | BioLegend     | Cat#154406     |
| Pacific Blue™ anti-human/mouse Granzyme B Antibody                       | BioLegend     | Cat#515408     |
| FOXP3 Monoclonal Antibody (FJK-16s), eFluor 450                          | eBioscience™  | Cat#48-5773-82 |
| BV650 Rat Anti-Mouse IFN- $\gamma$                                       | BD Horizon™   | Cat#563854     |
| BUV395 Rat Anti-Mouse CD4                                                | BD Horizon™   | Cat#563790     |
| BUV737 Hamster Anti-Mouse TCR $\beta$ Chain                              | BD Horizon™   | Cat#612821     |
| BUV395 Mouse Anti-Mouse CD45.2 (Clone 104 (RUO))                         | BD Horizon™   | Cat#564616     |
| Brilliant Violet 605™ anti-mouse CD4 Antibody (clone GK1.5)              | BioLegend     | Cat#100451     |
| Zombie NIR™ Fixable Viability Kit                                        | BioLegend     | Cat# 423105    |
| Anti-Interferon- $\alpha/\beta$ Receptor Chain 2 Antibody, clone MMHAR-2 | Sigma-Aldrich | Cat#MAB1155    |
| Mouse IgG2A Isotype Control, clone 20102                                 | R&D Systems   | Cat#MAB003     |
| Recombinant Human IFN- $\beta$                                           | PeproTech     | Cat#300-02BC   |
| <b><i>Biological Samples</i></b>                                         |               |                |

|                                                                |                                                 |                |
|----------------------------------------------------------------|-------------------------------------------------|----------------|
| PBMCs from healthy volunteers                                  | QIMR Berghofer<br>Medical Research<br>Institute | N/A            |
|                                                                |                                                 |                |
| <b><i>Chemicals, Peptides, and Recombinant Proteins</i></b>    |                                                 |                |
| $\beta$ -Mercaptoethanol                                       | Sigma-Aldrich                                   | Cat#M6250      |
| Glutamax I, 100X                                               | Life Technologies                               | Cat#35050061   |
| BD Cytotfix™ Fixation Buffer Set                               | BD Biosciences                                  | Cat#554714     |
| RPMI 1640 Media                                                | Life Technologies                               | Cat#11875-093  |
| Non-Essential Amino Acids Solution (100X)                      | Sigma-Aldrich                                   | Cat#M7145      |
| D-(+)-Glucose solution                                         | Sigma-Aldrich                                   | Cat#G8769      |
| Sodium pyruvate solution                                       | Sigma-Aldrich                                   | Cat# S8636     |
| ImmunoCult™ Human CD3/CD28/CD2 T Cell<br>Activator             | Stemcell<br>Technologies                        | Cat#10970      |
| RIPA Buffer (10X)                                              | Cell Signaling<br>Technology                    | Cat#9806S      |
| PMSF                                                           | Cell Signaling<br>Technology                    | Cat#8553       |
| Protease Inhibitor Cocktail (100X)                             | Cell Signaling<br>Technology                    | Cat#5871       |
| eBioscience™ Foxp3/Transcription Factor<br>Staining Buffer Set | Thermo Fisher<br>Scientific                     | Cat#00-5523-00 |
| Ficoll-Paque™ PLUS density gradient media                      | GE Healthcare                                   | Cat#17144003   |

|                                                                           |                              |                       |
|---------------------------------------------------------------------------|------------------------------|-----------------------|
| Bolt™ 4-12% Bis-Tris Plus Gels                                            | Life Technologies            | Cat#NW04125BO<br>X    |
| 20X Bolt™ MES SDS Running Buffer                                          | Life Technologies            | Cat#B0002             |
| Bolt™ Transfer Buffer (20X)                                               | Life Technologies            | Cat#BT0006            |
| Bolt™ Antioxidant                                                         | Life Technologies            | Cat#BT0005            |
| DTT (Dithiothreitol)                                                      | Cell Signaling<br>Technology | Cat#7016              |
| Blue Loading Buffer Pack                                                  | Cell Signaling<br>Technology | Cat# 7722             |
| Immobilon-FL 10x 10cm Sheet 10pk PVDF<br>0.45um                           | Millennium Science           | Cat#MMI-<br>IPFL10100 |
| Odyssey® Blocking Buffer in PBS                                           | LI-COR Bioscience            | Cat#927-40000         |
| Human IL-2 IS, research grade                                             | Miltenyi Biotec              | Cat#130-097-742       |
| GoTaq® qPCR Master Mix                                                    | Promega                      | Cat#A6001             |
| ExoSAP-IT™ PCR Product Cleanup Reagent<br>100X                            | Life Technologies            | Cat#78200             |
| HEPES 1M                                                                  | Life Technologies            | Cat#15630080          |
| iBright™ Prestained Protein Ladder                                        | Life Technologies            | Cat# LC5615           |
| QuickExtract™ DNA Extraction Solution                                     | Lucigen                      | Cat#QE0905T           |
| Dimethyl sulfoxide Hybri-Max™                                             | Sigma-Aldrich                | Cat#D2650             |
| GoTaq® Flexi DNA Polymerase                                               | Promega                      | Cat# M8295            |
| Trypan blue stain (0.4%) for use with<br>Countess™ Automated Cell Counter | Invitrogen                   | Cat# T10282           |
| Zombie Aqua™ fixable viability dye kit                                    | BioLegend                    | Cat#423102            |

|                                                            |                          |                    |
|------------------------------------------------------------|--------------------------|--------------------|
| 2'3'-cGAMP                                                 | Jomar Life Research      | Cat#tlrl-nacga23-1 |
| GeneRuler 100 bp DNA Ladder                                | Life Technologies        | Cat#SM0241         |
| Tween 20                                                   | Sigma-Aldrich            | Cat#P1379          |
| Fetal Bovine Serum, certified, United States               | Life Technologies        | Cat#16000044       |
| N,N-Dimethylacetamide                                      | Sigma-Aldrich            | Cat#271012         |
| INCB018424 (Ruxolitinib)                                   | Chemietek                | CT-INCB            |
| Riamet 20/120 (20mg artemether and 120mg lumefantrine; AL) | Novartis                 | • N/A              |
|                                                            |                          |                    |
| <b><i>Critical Commercial Assays</i></b>                   |                          |                    |
| P3 Primary Cell 4D-Nucleofector™ X Kit S                   | Lonza                    | Cat#V4XP-3032      |
| DC™ Protein Assay Kit II                                   | Bio-Rad                  | Cat#5000112        |
| EasySep™ Human CD4+ T Cell Isolation Kit                   | Stemcell<br>Technologies | Cat#17952          |
| High-capacity cDNA Reverse Transcription Kit               | Applied Biosystems       | Cat#4368814        |
| QIAshredder                                                | QIAGEN                   | Cat#79654          |
| RNase-free DNase Set                                       | QIAGEN                   | Cat#79254          |
| RNeasy Mini Kit                                            | QIAGEN                   | Cat#74104          |
| ISOLATE II Genomic DNA Kit                                 | Bioline                  | Cat#BIO-52065      |
| T7 Endonuclease                                            | New England Biolabs      | Cat#M0302S         |
| NEBuffer™ 2                                                | New England Biolabs      | Cat#B7002S         |

|                                                                            |                 |                  |
|----------------------------------------------------------------------------|-----------------|------------------|
| IFN $\gamma$ Secretion Assay – Detection Kit (APC), human                  | Miltenyi Biotec | Cat# 130-090-762 |
| IL-10 Secretion Assay – Detection Kit (PE), human                          | Miltenyi Biotec | Cat# 130-090-434 |
|                                                                            |                 |                  |
| <b><i>Oligonucleotides</i></b>                                             |                 |                  |
| Modified gRNA targeting the <i>TMEM173</i> locus<br>(GGCUGUCACUCACAGGUACC) | Synthego        | N/A              |
| Modified gRNA targeting the <i>TMEM173</i> locus<br>(ACAGGUACCGGGGCAGCUAC) | Synthego        | N/A              |
| Modified negative control gRNA                                             | Synthego        | N/A              |
| RT <sup>2</sup> qPCR Primer Assay for Human <i>18SrRNA</i><br>330001       | QIAGEN          | PPH05666E-200    |
| RT <sup>2</sup> qPCR Primer Assay for Human <i>TMEM173</i>                 | QIAGEN          | PPH18521A-200    |
| RT <sup>2</sup> qPCR Primer Assay for Mouse <i>Tmem173</i>                 | QIAGEN          | PPM29247A-200    |
| RT <sup>2</sup> qPCR Primer Assay for Human <i>IL10</i>                    | QIAGEN          | PPH00572C        |
| RT <sup>2</sup> qPCR Primer Assay for Human <i>IFNG</i>                    | QIAGEN          | Cat# PPH00380C   |
| Human <i>TMEM173</i> Forward PCR primer<br>(ACTTGCCAGAGCTTCTACC)           | Sigma-Aldrich   | N/A              |
| Human <i>TMEM173</i> Reverse PCR primer<br>(GTCATGGATTCTTGGTGCCC)          | Sigma-Aldrich   | N/A              |

|                                                                                 |               |     |
|---------------------------------------------------------------------------------|---------------|-----|
| Mouse <i>Ifnar ko</i> Forward PCR primer<br>(CAC TGG AGA AAC CTT CCT TC)        | Sigma-Aldrich | N/A |
| Mouse <i>Ifnar ko</i> Reverse PCR primer<br>(CAG TAA GTA GTC TCT CTG GCA AG)    | Sigma-Aldrich | N/A |
| Mouse <i>PbTII TCR α</i> Forward PCR primer<br>(GGATCCAGGAATGGACAAGATTCTG)      | Sigma-Aldrich | N/A |
| Mouse <i>PbTII TCR α</i> Reverse PCR primer<br>(CAGATCTCAACTGGACCACAG)          | Sigma-Aldrich | N/A |
| Mouse <i>PbTII TCR β</i> Forward PCR primer<br>(GGATCGATCACACTTGTTCCTG)         | Sigma-Aldrich | N/A |
| Mouse <i>PbTII TCR β</i> Reverse PCR primer<br>(GATCGATCAGCTCACCTAACACGAGGA)    | Sigma-Aldrich | N/A |
| Mouse <i>Tmem173 neo/neo</i> Forward PCR primer<br>(CTG TGC TCG ACG TTG TCA CT) | Sigma-Aldrich | N/A |
| Mouse <i>Tmem173 neo/neo</i> Reverse PCR primer<br>(GCT CTT CGT CCA GAT CAT CC) | Sigma-Aldrich | N/A |
| Mouse <i>Tmem173 flpase</i> Forward PCR primer<br>(GCT GGG AAT TGA ACG TAG GA)  | Sigma-Aldrich | N/A |
| Mouse <i>Tmem173 flpase</i> Reverse PCR primer<br>(GAG ACA AAG GCA AGC AC)      | Sigma-Aldrich | N/A |
|                                                                                 |               |     |
| <i>Data sets</i>                                                                |               |     |



|                                |                                                                                                                                                                                                                                                                                                                                                               |                                    |
|--------------------------------|---------------------------------------------------------------------------------------------------------------------------------------------------------------------------------------------------------------------------------------------------------------------------------------------------------------------------------------------------------------|------------------------------------|
| Human RNAseq data set          | European Genome-Phenome Archive (EGA) database ( <a href="https://ega-archive.org/">https://ega-archive.org/</a> )                                                                                                                                                                                                                                            | accession #<br>EGAS000010044<br>54 |
| <b>Software and Algorithms</b> |                                                                                                                                                                                                                                                                                                                                                               |                                    |
| FlowJo, v10 OSX                | FlowJo, LLC.<br><br><a href="https://www.flowjo.com/">https://www.flowjo.com/</a>                                                                                                                                                                                                                                                                             |                                    |
| EdgeR                          | Robinson, M.D., D.J. McCarthy, and G.K. Smyth, <i>edgeR: a Bioconductor package for differential expression analysis of digital gene expression data</i> . Bioinformatics, 2010. <b>26</b> (1): p. 139-40.<br><br><a href="https://bioconductor.org/packages/release/bioc/html/edgeR.html">https://bioconductor.org/packages/release/bioc/html/edgeR.html</a> |                                    |

|                                                    |                                                                                                                                                                                                                    |                     |
|----------------------------------------------------|--------------------------------------------------------------------------------------------------------------------------------------------------------------------------------------------------------------------|---------------------|
| GraphPad Prism 7, v7.0c                            | GraphPad Software<br><a href="https://www.graphpad.com/scientific-software/prism/">https://www.graphpad.com/scientific-software/prism/</a>                                                                         |                     |
| Ingenuity Pathway Analysis (IPA), version 43605602 | QIAGEN<br><a href="https://www.qiagenbioinformatics.com/products/ingenuity-pathway-analysis/">https://www.qiagenbioinformatics.com/products/ingenuity-pathway-analysis/</a>                                        |                     |
| R Project for Statistical Computing                | <a href="https://www.r-project.org/">https://www.r-project.org/</a>                                                                                                                                                | RRID:<br>SCR_001905 |
| RStudio Desktop, v1.0.136 - 1.2.1335               | <a href="https://www.rstudio.com/products/RStudio/">https://www.rstudio.com/products/RStudio/</a>                                                                                                                  |                     |
| <b><i>Other</i></b>                                |                                                                                                                                                                                                                    |                     |
| tSNEplots, v1.4                                    | <i>Ashhurst, T. M. (2017). tSNEplots v1.4. GitHub repository. DOI: TBC, repository: <a href="https://github.com/sydneycytometry/tSNEplots/releases">https://github.com/sydneycytometry/tSNEplots/releases</a>.</i> |                     |
